# Supplementary material for: Suicide literacy and attitudes toward psychological help-seeking: a cross-sectional study of students
Source: PubMed Central journal article supplement — J Int Med Res. 2023 May 16;51(5):03000605231172452. doi: 10.1177/03000605231172452 (PMC10192667; doi:10.1177/03000605231172452), 2023-05-16
Supplement: sj-pdf-1-imr-10.1177_03000605231172452.pdf [file sj-pdf-1-imr-10.1177_03000605231172452.pdf]

## Supplementary data

### Questionnaire

1. What is your sex?
  - Male
  - Female
  - Other
2. What is your age? \_\_\_\_
3. What is your study field?
  - Social sciences (e.g., law, political science, psychology, economics, management, sports)
  - Biomedical sciences (e.g., biology, medicine, odontology, pharmacy)
  - Physical sciences (e.g., mathematics, physics, biochemistry, geology, informatics, geography)
  - Technological sciences (e.g., logistics, chemistry, computer engineering)
  - Arts (e.g., music, art, theater, architecture, audiovisual art)
  - Humanities (e.g., philosophy, philology, history, art history)
4. In what year are you currently studying?
  - First
  - Second
  - Third
  - Fourth
  - Fifth or first of Master's
  - Sixth or second of Master's
  - I am a doctorant
  
5. Please complete the following table:

| Statements regarding literacy of suicide                                                        | True | False |
|-------------------------------------------------------------------------------------------------|------|-------|
| 1. Talking about suicide always increases the risk of suicide                                   |      |       |
| 2. A suicidal person will always be suicidal and entertain thoughts of suicide                  |      |       |
| 3. Very few people have thoughts about suicide                                                  |      |       |
| 4. If assessed by a psychiatrist, everyone who kills themselves would be diagnosed as depressed |      |       |
| 5. People who talk about suicide rarely kill themselves                                         |      |       |
| 6. People who want to attempt suicide can change their mind quickly                             |      |       |
| 7. Not all people who attempt suicide plan their attempt in advance                             |      |       |
| 8. Men are more likely to die by suicide than women                                             |      |       |
| 9. Most people who suicide are psychotic                                                        |      |       |
| 10. There is a strong relationship between alcoholism and suicide                               |      |       |
| 11. Seeing a psychiatrist or psychologist can help prevent someone from suicide                 |      |       |
| 12. People who have thoughts about suicide should not tell others about it                      |      |       |

6. Please complete the following table:

| Statements regarding attitudes toward seeking professional psychological help                                                                                 | Agree | Partially agree | Partially disagree | Disagree |
|---------------------------------------------------------------------------------------------------------------------------------------------------------------|-------|-----------------|--------------------|----------|
| 1. If I believed I was having a mental breakdown, my first inclination would be to get professional attention                                                 |       |                 |                    |          |
| 2. The idea of talking about problems with a counselor strikes me as a poor way to get rid of emotional conflicts                                             |       |                 |                    |          |
| 3. If I were experiencing a serious emotional crisis at this point in my life, I would be confident that I could find relief in counseling                    |       |                 |                    |          |
| 4. There is something admirable in the attitude of a person who is willing to cope with his or her conflicts and fears without resorting to professional help |       |                 |                    |          |
| 5. I would want to get psychological help if I were worried or upset for a long period of time                                                                |       |                 |                    |          |
| 6. I might want to have psychological counseling in the future                                                                                                |       |                 |                    |          |
| 7. A person with an emotional problem is not likely to solve it alone; he or she is likely to solve it with professional help                                 |       |                 |                    |          |
| 8. Considering the time and expense involved in counseling, it would have doubtful value for a person like me                                                 |       |                 |                    |          |
| 9. A person should work out his or her own problems; getting psychological counseling would be a last resort                                                  |       |                 |                    |          |
| 10. Personal and emotional troubles, like many things, tend to work out by themselves                                                                         |       |                 |                    |          |

7. In the past month:

- how often have you had thoughts about suicide? (0 = Never, 10 = Always) \_\_\_\_
- how much control have you had over these thoughts? (0 = No control, 10 = Full control) \_\_\_\_
- how close have you come to making a suicide attempt? (0 = Not close at all, 10 = Made an attempt) \_\_\_\_
- to what extent have you felt tormented by thoughts about suicide? (0 = Not at all, 10 = Extremely) \_\_\_\_
- how much have thoughts about suicide interfered with your ability to carry out daily activities, such as work, household tasks or social activities? (0 = Not at all, 10 = Extremely) \_\_\_\_

**Thank you for your time**
